# Supplementary material for: Generation of hypoimmunogenic universal iPSCs through HLA-type gene knockout
Source: Research Square preprint supplement (doi:10.21203/rs.3.rs-4354435/v1), 2024-07-03
Supplement: Supplementary file 3 [file c6b7d95e20e13053155db49d.docx]

**Supplementary Tables Information**

**Generation of hypoimmunogenic universal iPSCs through HLA-type gene knockout**

Juryun Kim, Yoojun Nam, Doyeong Jeon, Yujin Choi, SeonJu Choi, Chang Pyo Hong, Hyerin Jung, Narae Park, Yeowon Sohn, Yeri Alice Rim and Ji Hyeon Ju

This word file include:

Supplementary Table 1to 6.

**Supplementary Tables**

**Table 1. The primer list of pluripotency markers, three germ layer differentiation markers, and human leukocyte antigen (*HLA*)**

| **Genes** | **Direction** | **Sequence** |
| --- | --- | --- |
| *NANOG* | Forward | GATTTGTGGGCCTGAAGAAA |
| Reverse | CAGATCCATGGAGGAAGGAA |
| *OCT4* | Forward | ACCCCTGGTGCCGTGAA |
| Reverse | GGCTGAATACCTTCCCAAATA |
| *SOX2* | Forward | ATGGGTTCGGTGGTCAAGTC |
| Reverse | CTGATCATGTCCCGGAGGTC |
| *LIN28* | Forward | GTTCGGCTTCCTGTCCAT |
| Reverse | CTGCCTCACCCTCCTTCA |
| *KLF4* | Forward | TTCCCATCTCAAGGCACAC |
| Reverse | GGTCGCATTTTTGGCACT |
| *PAX6* | Forward | GTGTCCAACGGATGTGTGAG |
| Reverse | CTAGCCAGGTTGCGAAGAAC |
| *BRACHYURY* | Forward | AATTGGTCCAGCCTTGGAAT |
| Reverse | CGTTGCTCACAGACCACA |
| *SOX17* | Forward | CGCACGGAATTTGAACAGTA |
| Reverse | GGATCAGGGACCTGTCACAC |
| *HLA-A* | Forward | AGATACACCTGCCATGTGCAGC |
| Reverse | GATCACAGCTCCAAGGAGAACC |
| *HLA-B* | Forward | CTGCTGTGATGTGTAGGAGGAAG |
| Reverse | GCTGTGAGAGACACATCAGAGC |
| *HLA-C* | Forward | GGAGACACAGAAGTACAAGCGC |
| Reverse | ACATCCTCTGGAGGGTGTGAGA |
| *HLA-DRA* | Forward | AGCTGTGGACAAAGCCAACCTG |
| Reverse | CTCTCAGTTCCACAGGGCTGTT |

**Table 2. Primer sequence for Sanger sequencing (human leukocyte antigen [*HLA*]-*A*)**

|  | **Primer name** | **Sequence** | **PCR product** |
| --- | --- | --- | --- |
| PCR Primer | G0002-HLA-A-947-F | GGAGGGAAACCGCCTCTGC | 947bp |
| PCR Primer | G0002-HLA-A-947- R | GGAGATCTACAGGCGATCAGGG |
| Sequencing primer | G0002-HLA-A-Seq-F | TCTTCACATCCGTGTCCCG |  |
| Sequencing Primer | G0002-Seq-R | ACTTGCGCTTGGTGATCTGA |  |

**Table 3. Primer sequence for Sanger sequencing (human leukocyte antigen [*HLA*]-*B*)**

|  | **Primer name** | **Sequence** | **PCR product** | |
| --- | --- | --- | --- | --- |
| Exon 2 | | | | |
| PCR Primer | G0002-HLA-B-exon2-F | ACTTGTGTCGGGTCCTTCTTC | 714bp | |
| PCR Primer | G0002-HLA-B-exon2-R | CTCGGACCCGGAGACTCG |
| Sequencing primer | G0002-HLA-B-Seq-F | TCAGAGTCTCCTCAGACGCC |  | |
| Exon 3 | | | | |
| PCR Primer | G0002-HLA-B-exon3-F | GGCTACTACAACCAGAGCGAG | 822bp | |
| PCR Primer | G0002-HLA-B-exon3-R | GAAAAGTCACGGTTCCCAAGG |
| Sequencing primer | G0002-HLA-B-exon3- Seq-F | GTCGCCCCGAGTCTCCG |  | |
| Sequencing primer | G0002-HLA-B-exon3- Seq-R | GAAAAGTCACGGTTCCCAAGG |  | |
|  |  |  |  |

**Table 4. Primer sequence for Sanger sequencing (human leukocyte antigen [*HLA*]-*DRA*)**

|  | **Primer name** | **Sequence** | **product size** |
| --- | --- | --- | --- |
| Exon 2 | | | |
| PCR Primer | G0002-HLA-DRA-Exon2-F | GCCCGGGTAAAGAAAGTGAGAG | 754bp |
| PCR Primer | G0002-HLA-DRA-Exon2-R | GAATTTGGGGCTTGTTAATGGC |
| Sequencing primer | G0002-HLA-DRA-exon2- Seq-F | ACTCTGGGTTCTTTAGCCCTC |  |
| Sequencing primer | G0002-HLA-DRA-exon2- Seq-R | GTTGGCCAATGCACCTTGAG |  |
| Exon 3 | | | |
| PCR Primer | G0002-HLA-DRA-exon 3-F | GGGGGTGCTGTCAGAGATTG | 748bp |
| PCR Primer | G0002-HLA-DRA-exon3-R | GGGAAATAAGGCAGAGTACATGGT |
| Sequencing primer | G0002-HLA-DRA-exon3- Seq-F | CGTTTGTACCACAATTGAGCATGG |  |
| Sequencing primer | G0002-HLA-DRA-exon3- Seq-R | CACCGAGTTTCACACAAGCATC |  |

**Table 5. Variants associated with genome editing detected from whole-genome sequencing (WGS) data of clones A7 and B2**

| Clone | Structural  variant | Detail of variant type | Size of variant  (bp) | Position (bp) on chromosome | Related gene |
| --- | --- | --- | --- | --- | --- |
| A7 | Deletion | c.170_197del  (p.Phe57SerfsTer11) | 28 bp | Chr6:29,942,853-  29,942,880 | *HLA-A* |
| B2 | Deletion | c.165_198del (p.Gln56ArgfsTer10) | 34 bp | Chr6:29,942,847-  29,942,880 | *HLA-A* |
| B2 | Deletion | CNV loss | 636,211 bp | Chr2:137,427,785-  138,063,995 | *THSD7B ~*  *HNMT* |
| B2 | Deletion | CNV loss | 1,085,752 bp | Chr6:31,356,818-  32,442,567 | *HLA-B ~*  *HLA-DRA* |

*fs, frame-shift; Ter, termination

**Table 6. Detection of somatic variants from whole-genome sequencing (WGS) data**

| Variants | No. of SNV | | | No. of InDel | | |
| --- | --- | --- | --- | --- | --- | --- |
| YiP3:  Donor vs WT | WT vs A7 | WT vs B2 | YiP3:  Donor vs WT | WT vs A7 | WT vs B2 |
| Variant type (total no. of variant) | 90 | 18 | 21 | 89 | 22 | 26 |
| Introns | 78 | 17 | 18 | 78 | 17 | 20 |
| 5'-/3'-UTRs | 11 | 1 | 3 | 11 | 3 | 4 |
| Coding exons | 1 | 0 | 0 | 0 | 2 | 2 |
| Synonymous variants | 0 | 0 | 0 | 0 | 0 | 0 |
| Variant related to functional effects | 1 | 0 | 0 | 0 | 2 | 2 |
| Missense (+ start lost, stop lost) | 1 | 0 | 0 | 0 | 0 | 0 |
| Frame-shift | 0 | 0 | 0 | 0 | 2 | 2 |
| In-frame | 0 | 0 | 0 | 0 | 0 | 0 |
| Nonsense | 0 | 0 | 0 | 0 | 0 | 0 |
| Splice site | 0 | 0 | 0 | 0 | 0 | 0 |
| Variant annotation (total no. of variant) | 0 | 0 | 0 | 0 | 0 | 0 |
| PolyPhen2/SIFT | 0 | 0 | 0 | 0 | 0 | 0 |
| ClinVar mutation | 0 | 0 | 0 | 0 | 0 | 0 |
| Mutation in COSMIC Tier 1 gene | 0 | 0 | 0 | 0 | 0 | 0 |

*WT, Passage 15 of YiP3
